# Supplementary material for: The mountain papaya may be a possible reservoir of the Kashmir bee virus
Source: PeerJ. 2025 Feb 21;13:e18634. doi: 10.7717/peerj.18634 (PMC11849520; doi:10.7717/peerj.18634)
Supplement: Supplemental Information 1 — The single nucleotide polymorphisms (SNPs) identified in the KBV-Ch (Chile) consensus sequence and the position of each SNP in the reference genome, the reference allele, and the corresponding KBV-Ch allele. [file peerj-13-18634-s001.xlsx]

## Sheet: Hoja1
Supplementary Table 1. SNPs found in KBV-Ch
Position in Reference Genome	Reference allele	KBV-Ch allele
401	A	T
406	T	C
523	C	T
550	T	C
617	T	C
728	G	A
729	T	C
730	G	A
740	A	G
803	T	C
838	A	C
911	G	A
962	T	C
1808	A	G
1832	A	G
1835	G	A
1859	G	A
1925	C	T
1952	G	A
2084	C	G
2132	T	C
2201	T	C
2237	C	T
2258	G	A
2429	T	C
2501	A	C
2522	T	C
2528	C	T
2531	T	C
2546	T	C
2564	G	A
2696	C	T
2699	T	C
2708	A	G
2753	G	A
2764	G	C
2867	A	G
2897	G	A
2900	A	G
2939	A	T
2957	T	C
2972	C	T
2999	T	C
3005	T	C
3011	T	C
3038	A	G
3056	T	C
3063	C	T
3065	T	C
3082	T	C
3122	T	C
3125	C	T
3143	C	T
3179	T	C
3197	C	T
3203	T	C
3242	G	A
3451	C	T
3467	C	T
3497	T	C
3524	G	A
3578	G	A
3579	G	A
3584	C	T
3620	T	C
3622	G	A
3623	G	A
3659	C	T
3993	A	G
4002	C	T
4058	C	T
4079	T	C
4106	C	T
4175	C	T
4187	T	C
4223	T	C
4224	G	T
4349	G	A
4376	T	C
4400	C	T
4403	T	C
4439	T	C
4458	T	C
4505	A	G
4511	T	C
4544	A	G
4552	T	C
4574	G	A
4844	A	G
4847	G	A
4919	T	C
5025	A	G
5073	T	C
5100	G	T
5121	G	T
5219	T	C
5228	C	T
5264	A	G
5279	A	G
5285	C	T
5294	T	C
5318	C	T
5393	C	T
5396	C	T
5717	A	C
5744	T	G
5747	A	G
5750	G	A
5775	G	A
5777	C	T
5816	T	C
5834	A	G
5906	G	A
6020	T	C
6029	T	C
6062	G	A
6075	A	G
6092	T	C
6122	T	C
6128	T	C
6185	G	A
6227	T	C
6275	T	C
6601	T	C
6606	C	T
6622	C	T
6860	T	C
7061	T	C
7064	T	C
7118	T	C
7154	T	A
7172	A	C
7175	T	C
7184	A	G
7223	T	C
7574	T	C
7587	T	C
7613	A	C
7655	A	G
7706	G	A
7736	T	C
7784	T	C
7838	T	C
7856	T	C
7871	T	C
7895	C	T
7919	C	T
7984	G	A
7997	G	A
8000	T	A
8003	A	G
8005	A	C
8009	G	A
8033	C	A
8036	T	A
8063	C	T
8072	T	C
8079	G	T
8086	A	C
8102	G	T
8126	A	G
8150	T	C
8168	T	C
8174	T	A
8198	A	C
8291	G	A
8292	A	T
8298	T	C
8309	A	C
8318	A	T
8321	C	T
8327	C	T
8336	G	A
8339	T	C
8433	C	A
8435	T	C
8436	G	A
8438	T	C
8442	G	A
8459	T	C
8478	T	C
8489	G	A
8519	G	T
8552	A	G
8582	T	C
8641	T	A
8690	T	C
8741	T	C
8774	G	A
8783	T	C
8819	T	C
8877	G	A
9050	C	T
9059	T	C
9113	C	T
9147	T	A
9236	C	T
9272	T	C
9315	T	C
